# Supplementary material
Source: Springer Nature journal article supplement (https://www.springermedizin.de/resource/supplementary/12985_2007_404_MOESM2_ESM.pdf/9608006)

- 0.005 substitutions/site

BF1  
CI113  
CI114  
CI110  
CI112  
CI111  
CI121  
CI129  
CI138

CI17

CI116

CI115  
CI63

Ser2/3

Ni1

Ni2

CI4

Ser1

Tz5

Tz8

Mg1

Ser4

Tz14

Ser5

Tz3

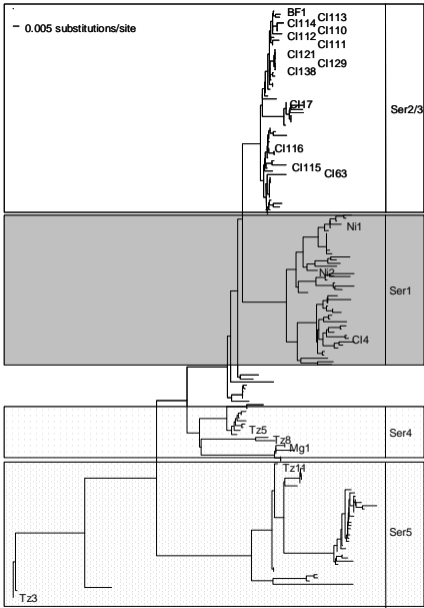

Supplement: MOESM2 [file 9608006]
